# Supplementary material
Source: PubMed Central journal article supplement (PMC3416188)
Supplement: MCB.06706-11_zmb999109561so1.pdf [file MCB.06706-11_zmb999109561so1.pdf]

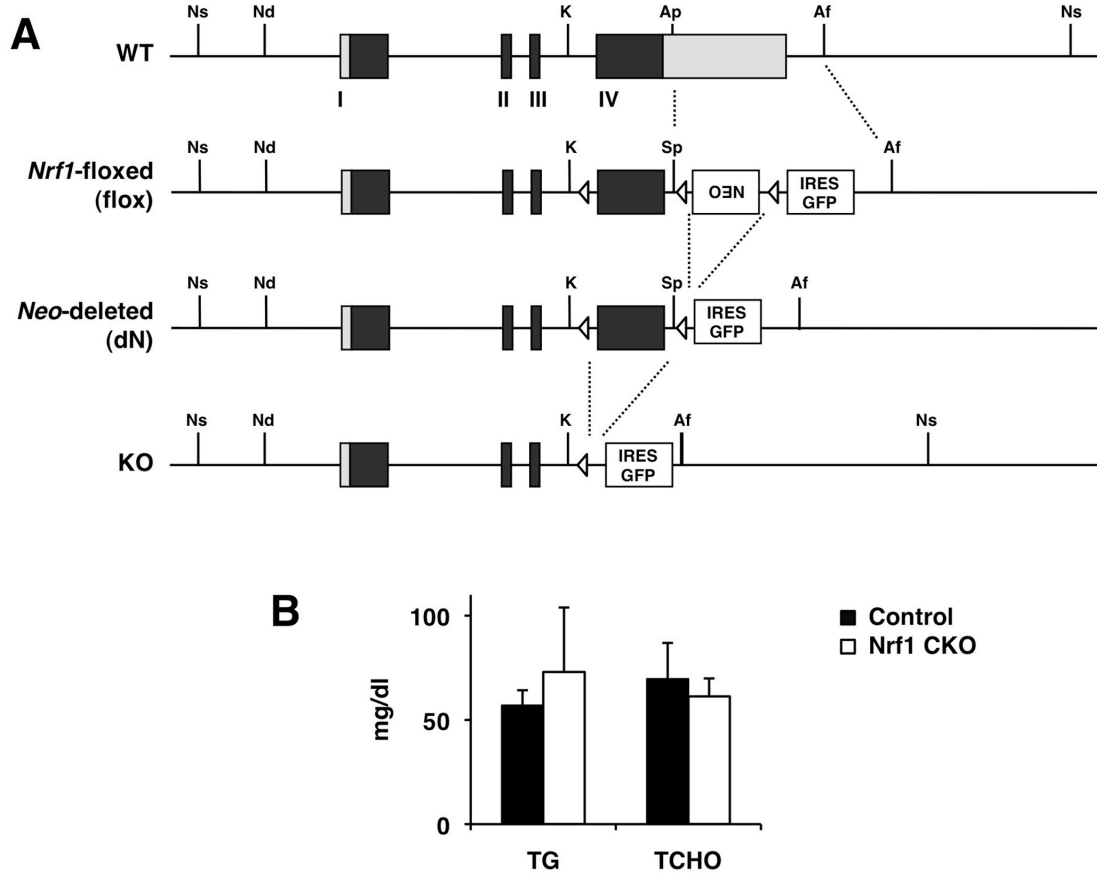

**FIG. S1.** Generation of *Nrf1* CKO mice using the *Neo*-deleted (dN) allele. (A) The structure of the *Nrf1* wild-type (WT), *Nrf1*-floxed (Ohtsui et al., 2008), dN, and *Nrf1*-deleted (KO) alleles is shown. *Neo* gene was removed from *Nrf1*-floxed allele to generate dN allele by mating with *Ayul-Cre* mice that express ubiquitous Cre recombinase. (B) Serum triglyceride (TG) and serum total cholesterol (TCHO) in the control and *Nrf1* CKO mice. The data represent the mean  $\pm$  SD (n = 3-4)

**Table S1. Oligonucleotides used for qRT-PCR, ChIP-qPCR and EMSA.**

| Name                              | Sequence                                      |
|-----------------------------------|-----------------------------------------------|
| <b>Primers used for qRT-PCR</b>   |                                               |
| Acox1 forward                     | 5'-GCCCAACTGTGACTTCCATC-3'                    |
| Acox1 reverse                     | 5'-CCAGGACTATCGCATGATTG-3'                    |
| Ahcy forward                      | 5'-GAGAACGCGGTGGAGAAAG-3'                     |
| Ahcy reverse                      | 5'-CGCCATTCTTTAGCCAGTA-3'                     |
| Akr1d1 forward                    | 5'-AGGCCATCAGAGAAAAGATAGC-3'                  |
| Akr1d1 reverse                    | 5'-CATTGATGGGACATGCTCTG-3'                    |
| Fads1 forward                     | 5'-AACATGCACCCCCTCTTCTT-3'                    |
| Fads1 reverse                     | 5'-TGGTTGTATGGCATGTGCTT-3'                    |
| Gnmt forward                      | 5'-GCTGGACGTAGCCTGTGG-3'                      |
| Gnmt reverse                      | 5'-CACGTCATCACGCTGAA-3'                       |
| Hadh forward                      | 5'-TGAAGCTGAAGAACGAGCTG-3'                    |
| Hadh reverse                      | 5'-TTGCTGGCAAAGATGGTGT-3'                     |
| Hmgs2 forward                     | 5'-TTTTCATTCCGAGTGTCCAA-3'                    |
| Hmgs2 reverse                     | 5'-CACACTAGACACCAGTTTCTCCA-3'                 |
| Hprt forward                      | 5'-CTGGTGAAAAGGACCTCTCG-3'                    |
| Hprt probe                        | 5'-FAM-ATCCAACAAAGTCTGGCCTGTATCCAAC-TAMRA-3'  |
| Hprt reverse                      | 5'-TGAAGTACTCATTATAGTCAAGGG-3'                |
| Lipin1 forward                    | 5'-TCCCAGTTCGGACAGAGAAT-3'                    |
| Lipin1 probe                      | 5'-FAM-TCCCCAGCCCCAGCAG-TAMRA-3'              |
| Lipin1 reverse                    | 5'-GGAGTCCTCTGGCAATCTACC-3'                   |
| Mat1a forward                     | 5'-TCTGAGGCGCTCTGGTGT-3'                      |
| Mat1a reverse                     | 5'-CCTGCATGTACTGAACTGTTACCT-3'                |
| Nnmt forward                      | 5'-TGTGATCTTGAAGGCAACAGA-3'                   |
| Nnmt reverse                      | 5'-CTTGATTGCACGCCTCAAC-3'                     |
| Nrf1 forward                      | 5'-ACAGCAGTGGCAAGATCTCA-3'                    |
| Nrf1 probe                        | 5'-FAM-TGAAATGCAGGCTATGGAAGTAAATACAT-TAMRA-3' |
| Nrf1 reverse                      | 5'-GCAAGGCTGTAGTTGGTGCT-3'                    |
| Nrf2 forward                      | 5'-CAAGACTTGGGCCACTTAAAAGAC-3'                |
| Nrf2 probe                        | 5'-FAM-AGGCGGCTCAGCACCTTGATCTTG-TAMRA-3'      |
| Nrf2 reverse                      | 5'-AGTAAGGCTTTCCATCCTCATCAC-3'                |
| PGC-1 $\alpha$ forward            | 5'-ACCGCAGTCGCAACATGCTCA-3'                   |
| PGC-1 $\alpha$ reverse            | 5'-GGAACCCTTGGGGTCATTTGGTG-3'                 |
| PGC-1 $\beta$ forward             | 5'-GACGTGGACGAGCTTTCAC-3'                     |
| PGC-1 $\beta$ probe               | 5'-FAM-TACAGAAGCTCCTCCTGGCCACAT-TAMRA-3'      |
| PGC-1 $\beta$ reverse             | 5'-GAGCGTCAGAGCTTGCTGTT-3'                    |
| PPAR $\alpha$ forward             | 5'-GCTCCGAGGGCTCTGTCATC-3'                    |
| PPAR $\alpha$ probe               | 5'-FAM-ACACCCTCTCTCCAGCTTCC-TAMRA-3'          |
| PPAR $\alpha$ reverse             | 5'-GGGCAGCTGACTGAGGAAGG-3'                    |
| PPAR $\gamma$ forward             | 5'-CATGCTTGTGAAGGATGCAAG-3'                   |
| PPAR $\gamma$ reverse             | 5'-TTCTGAAACCGACAGTACTGACAT-3'                |
| SREBP1 forward                    | 5'-GATGTGCGAACTGGACACAG-3'                    |
| SREBP1 reverse                    | 5'-CATAGGGGGCGTCAAACAG-3'                     |
| <b>Primers used for ChIP-qPCR</b> |                                               |
| Lipin1 intron forward             | 5'-CAGAGGCACACTTGCTGAGT-3'                    |
| Lipin1 intron reverse             | 5'-GTTAGCTCCATCTGTGTGGAATTA-3'                |
| Lipin1 promoter forward           | 5'-GCCCTAGGCAGTGTGTTGTC-3'                    |

**Table S1 (continued)**

---

|                                |                                             |
|--------------------------------|---------------------------------------------|
| Lipin1 promoter reverse        | 5'-CCTCAGTTCTCTGGCTGAGTC-3'                 |
| Nqo1 promoter forward          | 5'-GCACGAATTCATTTACACGAGG-3'                |
| Nqo1 promoter probe            | 5'-FAM-AACGGATGGGCTCAAATTTTGC-TAMRA-3'      |
| Nqo1 promoter reverse          | 5'-GGAAGTCACCTTTGCACGCTAG-3'                |
| PGC-1 $\beta$ intron forward   | 5'-TAGATGCTTCTGGGCCTAGC-3'                  |
| PGC-1 $\beta$ intron reverse   | 5'-CACAGACTGAGTGGGTGTAT-3'                  |
| PPAR $\alpha$ 3' UTR forward   | 5'-ATCCTGGTGAGGGTTGAGC-3'                   |
| PPAR $\alpha$ 3' UTR reverse   | 5'-AAGCACTGAGGACTGGCTGT-3'                  |
| PPAR $\alpha$ promoter forward | 5'-CCCACTTGGAGACTCATCATGGGGT-3'             |
| PPAR $\alpha$ promoter reverse | 5'-AGGAAGGGATGCGTTTGCTCTGA-3'               |
| Txs intron3 forward            | 5'-GCAATAGGACTATCATGCGC-3'                  |
| Txs intron3 reverse            | 5'-ATGACAGGTCCAAACGAGAG-3'                  |
| Txs intron3 probe              | 5'-FAM-GAAGATGCCTTCAAAGGACAAGTACCC-TAMRA-3' |

---

**Oligonucleotides used for EMSA**

|                                      |                                             |
|--------------------------------------|---------------------------------------------|
| Lipin1 intron ARE WT forward         | 5'-CGCGGAGGCACACTTGCTGAGTCAGCACCCCGGGAGT-3' |
| Lipin1 intron ARE WT reverse         | 5'-CTAGACTCCCGGGGTGCTGACTCAGCAAGTGTGCCTC-3' |
| Lipin1 intron ARE Mut forward        | 5'-CGCGGAGGCACACTTCTGAGTCAGAACCCCGGGAGT-3'  |
| Lipin1 intron ARE Mut reverse        | 5'-CTAGACTCCCGGGGTCTGACTCAGAAAGTGTGCCTC-3'  |
| Lipin1 promoter ARE WT forward       | 5'-CGCGTGCCGCTGAGCTGTGACTCAGCCAGAGAACTGA-3' |
| Lipin1 promoter ARE WT reverse       | 5'-CTAGTCAGTTCTCTGGCTGAGTCACAGCTCAGCGGCA-3' |
| Lipin1 promoter ARE Mut forward      | 5'-CGCGTGCCGCTGAGCTGTGACTCAGACAGAGAACTGA-3' |
| Lipin1 promoter ARE Mut reverse      | 5'-CTAGTCAGTTCTCTGTCTGAGTCACAGCTCAGCGGCA-3' |
| Nqo1 promoter ARE WT forward         | 5'-CGCGTCTAGAGTCACAGTGAGTCGGCAAATTTGAGC-3'  |
| Nqo1 promoter ARE WT reverse         | 5'-CTAGGCTCAAATTTTGCCGACTCACTGTGACTCTAGA-3' |
| Nqo1 promoter ARE Mut forward        | 5'-CGCGTCTAGAGTCACAGTGAGTCGACAAAATTTGAGC-3' |
| Nqo1 promoter ARE Mut reverse        | 5'-CTAGGCTCAAATTTGTGACTCACTGTGACTCTAGA-3'   |
| PGC-1 $\beta$ intron ARE WT forward  | 5'-CGCGGAGGGGAACATGCTGACTCAGCAGCTCCGAATA-3' |
| PGC-1 $\beta$ intron ARE WT reverse  | 5'-CTAGTATTCGGAGCTGCTGAGTCAGCATGTTCCCCTC-3' |
| PGC-1 $\beta$ intron ARE Mut forward | 5'-CGCGGAGGGGAACATTCTGACTCAGAAGCTCCGAATA-3' |
| PGC-1 $\beta$ intron ARE Mut reverse | 5'-CTAGTATTCGGAGCTTCTGAGTCAGAATGTTCCCCTC-3' |

---

**Table S2. The pathway analysis in *Nrf1* CKO mice.**

| <b>Enriched events in downregulated genes in <i>Nrf1</i> CKO mice</b> |                                                                                                                                                                                                                                                                                                                                                                                                                                                                                                                                                                                    |
|-----------------------------------------------------------------------|------------------------------------------------------------------------------------------------------------------------------------------------------------------------------------------------------------------------------------------------------------------------------------------------------------------------------------------------------------------------------------------------------------------------------------------------------------------------------------------------------------------------------------------------------------------------------------|
| <b>p-value</b>                                                        | <b>Name of Event / List of Genes</b>                                                                                                                                                                                                                                                                                                                                                                                                                                                                                                                                               |
| 1.52E-18                                                              | <b>Metabolism of amino acids and derivatives</b><br>SLC38A4, SLC25A2, PSMD7, UROC1, ACADSB, PSMB1, MCCC2, GLS2, PAOX, PSMD4, HIBADH, IVD, TAT, PSMA6, GAMT, BBOX1, DLST, SLC3A1, SLC16A10, GPT2, HAAO, GCDH, BCKDHB, SLC38A3, FAH, PSMC2, PAH, SLC38A2, AFMID, PSMC6, GPT, AADAT, AGMAT, ALDH7A1, PSMA5, PSMC3, ASL, PSMC1, OTC, PSMD9, PSMB7, SHMT1, AGXT, PSMA7, AASS, SLC6A6, PSMD2, SLC6A12, PSMD3, PSMD12, ALDH6A1, HPD, OAZ1, SLC7A2, FTCD, ASS, HIBCH, QDPR, ARG1, TDO2, PSMB4                                                                                              |
| 1.50E-07                                                              | <b>Respiratory electron transport, ATP synthesis by chemiosmotic coupling, and heat production by uncoupling proteins. (Oxidative phosphorylation)</b><br>NDUFV2, ATP5I, UQCR, SDHB, NDUFS7, ATP5C1, NDUFA5, UQCRH, NDUFB8, SDHA, NDUFA11, ATP5H, NDUFA1, NDUFB9, NDUFB5, NDUFA10, NDUFS8, NDUFA2, NDUFB7, NDUFA6, ATP5A1, NDUFA9, ATP5G1, ATP5J, ATP5E, NDUFB10                                                                                                                                                                                                                   |
| 2.57E-06                                                              | <b>Metabolism of lipids and lipoproteins *</b><br>CYP17A1, SRD5A1, AGT, TM7SF2, PPM1L, STARD5, <u>PEX11A</u> , RXRA, MUT, ELOVL2, <u>CPT1A</u> , <u>APOC3</u> , <u>SLC27A2</u> , <u>DGAT1</u> , <u>LIPE</u> , <u>GPAM</u> , STAR, PRKAG2, <u>DECR1</u> , EBP, DGAT2, PRKAA2, <u>ACSL1</u> , <u>ABCG8</u> , <u>SLC10A1</u> , CYP39A1, <u>MGLL</u> , NCOR1, <u>AKRID1</u> , <u>ACOX1</u> , <u>DCI</u> , CYP7B1, PRKACB, LCAT, <u>LPIN1</u> , <u>APOA2</u> , HADHSC, HSD3B2, PPARBP, PCCB, <u>HMGCS2</u> , <u>FADS1</u> , IDH1, SLC27A5, ABCC3, ACLY, ACAA1, <u>SLC10A2</u> , HSD11B1 |
| 2.69E-06                                                              | <b>Proteasome cleavage of substrate (Proteasome subunit genes)</b><br>PSMD7, PSMA5, PSMC3, PSMB1, PSMC1, PSMD9, PSMB7, PSMD4, PSMA7, PSMA6, PSMD2, PSMD3, PSMD12, PSMC2, PSMC6, PSMB4                                                                                                                                                                                                                                                                                                                                                                                              |
| 2.61E-02                                                              | <b>Pyruvate metabolism and Citric Acid (TCA) cycle</b><br>DLST, PDHB, SDHB, IDH1, SDHA, PDK1, PDK2, IDH3B                                                                                                                                                                                                                                                                                                                                                                                                                                                                          |
| <b>Enriched events in upregulated genes in <i>Nrf1</i> CKO mice</b>   |                                                                                                                                                                                                                                                                                                                                                                                                                                                                                                                                                                                    |
| <b>p-value</b>                                                        | <b>Name of Event / List of Genes</b>                                                                                                                                                                                                                                                                                                                                                                                                                                                                                                                                               |
| 2.41E-20                                                              | <b>Cell Cycle, Mitotic</b><br>RFC3, TUBA1, BUB1, AURKB, CDH1, CDC25B, RPA2, CKS1B, MCM3, MCM5, CDC6, ANAPC1, MCM6, LIG1, DNCLC1, XPO1, POLA2, SKP2, MCM2, CDC45L, PRKAR2B, PKMYT1, MCM4, CENPJ, CDK6, KIF18A, CDC20, CENPH, NEK2, NUP43, SEC13L1, KIF2C, BIRC5, KIF20A, RRM2, TUBB4, MLF1IP, PLK1, CCNB1, SGOL1, CDC7, AURKA, TSGA14, ANAPC4, CENPF, SGOL2, FEN1, INCENP, UBE2C, CDCA1, CENPE, KNTC1, TUBGCP2, BUB1B, NUP107, CDKN1A, MAD2L1, CCND1, E2F1, PLK4, ORC1L, RFC4, TUBA3, CCNA2, POLD1, FSHPRH1, CCNB2, CCNE2, CDC25C, POLE2, KNTC2, MCM7, E2F2, POLE, CDCA8, PRIM1     |
| 3.34E-13                                                              | <b>DNA replication</b><br>RFC3, KIF20A, MLF1IP, BUB1, PLK1, SGOL1, CDC7, AURKB, CDH1, CENPF, RPA2, MCM3, SGOL2, INCENP, FEN1, MCM5, CDC6, CDCA1, MCM6, LIG1, XPO1, CENPE, KNTC1, BUB1B, POLA2, NUP107, CDKN1A, MAD2L1, CDC45L, MCM2, ORC1L, RFC4, POLD1, FSHPRH1, MCM4, KIF18A, CDC20, POLE2, CENPH, KNTC2, MCM7, POLE, NUP43, CDCA8, SEC13L1, KIF2C, PRIM1, BIRC5                                                                                                                                                                                                                 |

\* PPAR $\alpha$  target genes are underlined.



**Table S3 (continued 1)**

| <b>Glycolysis / Gluconeogenesis / Pentose phosphate pathway /TCA cycle</b> |        |        |        |        |        |        |
|----------------------------------------------------------------------------|--------|--------|--------|--------|--------|--------|
| Acetyl CoA divalent                                                        | N.D.   | N.D.   | N.D.   | N.D.   | N.D.   | N.D.   |
| cis-Aconitic acid                                                          | N.D.   | N.D.   | N.D.   | N.D.   | N.D.   | N.D.   |
| Citric acid                                                                | 118    | 181    | 148    | 93     | 111    | 107    |
| Dihydroxyacetone phosphate                                                 | 135    | 119    | 125    | 127    | 95     | 88     |
| Erythrose 4-phosphate                                                      | N.D.   | N.D.   | N.D.   | N.D.   | N.D.   | N.D.   |
| Fructose 1,6-diphosphate                                                   | 103    | 165    | 129    | 144    | 78     | 68     |
| Fructose 6-phosphate                                                       | 102    | 193    | 89     | 178    | 114    | 33     |
| Fumaric acid                                                               | 401    | 648    | 424    | 151    | 139    | 293    |
| Glucose 1-phosphate                                                        | 113    | 158    | 96     | 164    | 93     | 31     |
| Glucose 6-phosphate                                                        | 295    | 655    | 316    | 683    | 407    | 113    |
| Glyceraldehyde 3-phosphate                                                 | 19     | 16     | 19     | 16     | 16     | 8.3    |
| Isocitric acid                                                             | 9      | 10     | 9.1    | 6.2    | 6.9    | 5.1    |
| Lactic acid                                                                | 35,846 | 13,736 | 19,255 | 26,387 | 22,028 | 13,047 |
| Malic acid                                                                 | 2,457  | 4,633  | 2,873  | 1,087  | 950    | 2,161  |
| Malonyl CoA (divalent)                                                     | N.D.   | N.D.   | N.D.   | N.D.   | N.D.   | N.D.   |
| 2-Oxoglutaric acid                                                         | N.D.   | N.D.   | N.D.   | N.D.   | N.D.   | N.D.   |
| 2-Phosphoglyceric acid                                                     | 6.8    | 6.6    | 5      | 11     | 4.6    | 6.5    |
| 3-Phosphoglyceric acid                                                     | 91     | 80     | 65     | 157    | 42     | 76     |
| 6-Phosphogluconic acid                                                     | 32     | 37     | 31     | 29     | 29     | 12     |
| Phosphoenolpyruvic acid                                                    | 6.8    | 4      | 3.6    | 14     | 4.4    | 5      |
| 5-phosphoribosyl- $\alpha$ -1-pyrophosphate                                | N.D.   | N.D.   | N.D.   | N.D.   | N.D.   | N.D.   |
| Pyruvic acid                                                               | N.D.   | N.D.   | N.D.   | N.D.   | N.D.   | N.D.   |
| Ribose 5-phosphate                                                         | 28     | 24     | 22     | 33     | 20     | 25     |
| Ribulose 5-phosphate                                                       | 755    | 575    | 494    | 670    | 472    | 435    |
| Sedoheptulose 7-phosphate                                                  | 204    | 430    | 193    | 249    | 253    | 90     |
| Succinic acid                                                              | 2,019  | 1,442  | 1,465  | 1,632  | 2,497  | 1,442  |
| <b>Purine / Pyrimidine metabolism</b>                                      |        |        |        |        |        |        |
| Adenine                                                                    | 6.8    | 7.3    | 7.9    | 9      | 9.1    | 7.7    |
| Adenosine                                                                  | 26     | 31     | 26     | 26     | 23     | 20     |
| ADP                                                                        | 658    | 806    | 779    | 376    | 602    | 619    |
| AMP                                                                        | 5,621  | 3,212  | 3,367  | 3,455  | 2,001  | 3,330  |
| ATP                                                                        | 35     | 97     | 88     | 32     | 113    | 70     |
| cAMP                                                                       | N.D.   | N.D.   | N.D.   | N.D.   | N.D.   | N.D.   |
| CDP                                                                        | N.D.   | N.D.   | N.D.   | N.D.   | N.D.   | N.D.   |
| cGMP                                                                       | N.D.   | N.D.   | N.D.   | N.D.   | N.D.   | N.D.   |
| CMP                                                                        | 135    | 91     | 110    | 74     | 76     | 82     |
| CTP                                                                        | N.D.   | N.D.   | N.D.   | N.D.   | N.D.   | N.D.   |
| Cytidine                                                                   | 1.3    | 1.3    | 1.3    | 1.7    | 2.1    | 2.1    |
| Cytosine                                                                   | N.D.   | N.D.   | N.D.   | N.D.   | N.D.   | N.D.   |
| dATP                                                                       | N.D.   | N.D.   | N.D.   | N.D.   | N.D.   | N.D.   |
| dCTP                                                                       | N.D.   | N.D.   | N.D.   | N.D.   | N.D.   | N.D.   |
| dTDP                                                                       | N.D.   | N.D.   | N.D.   | N.D.   | N.D.   | N.D.   |
| dTMP                                                                       | N.D.   | N.D.   | N.D.   | N.D.   | N.D.   | N.D.   |
| dTTP                                                                       | N.D.   | N.D.   | N.D.   | N.D.   | N.D.   | N.D.   |
| GDP                                                                        | 10     | 16     | 15     | 11     | 18     | 15     |
| GMP                                                                        | 674    | 557    | 579    | 566    | 459    | 644    |
| GTP                                                                        | N.D.   | N.D.   | N.D.   | N.D.   | N.D.   | N.D.   |
| Guanine                                                                    | N.D.   | N.D.   | N.D.   | N.D.   | N.D.   | N.D.   |
| Guanosine                                                                  | 7.6    | 9      | 7      | 8.4    | 8.1    | 5.7    |
| Hypoxanthine                                                               | 81     | 42     | 47     | 79     | 64     | 60     |
| IMP                                                                        | 377    | 227    | 186    | 276    | 401    | 128    |

**Table S3 (continued 2)**

|                |       |       |       |       |       |       |
|----------------|-------|-------|-------|-------|-------|-------|
| Inosine        | 152   | 93    | 85    | 230   | 144   | 110   |
| Thymidine      | N.D.  | N.D.  | N.D.  | N.D.  | N.D.  | N.D.  |
| Thymine        | N.D.  | N.D.  | N.D.  | N.D.  | N.D.  | N.D.  |
| UDP            | 7.6   | 12    | 9     | 6.2   | 18    | 8.3   |
| UMP            | 1,459 | 948   | 1,076 | 951   | 847   | 1,005 |
| Uracil         | 13    | 7.9   | 8.8   | 32    | 16    | 18    |
| Uridine        | 93    | 65    | 79    | 269   | 143   | 122   |
| UTP            | N.D.  | N.D.  | N.D.  | N.D.  | 5.3   | N.D.  |
| <b>Others</b>  |       |       |       |       |       |       |
| NAD+           | 1,212 | 1,022 | 906   | 697   | 883   | 935   |
| NADP+          | 76    | 67    | 52    | 61    | 54    | 72    |
| Gluconic acid  | 2,433 | 1,281 | 1,692 | 1,600 | 1,246 | 1,665 |
| CoA (divalent) | 8.3   | 4.6   | 8.7   | 11    | 6     | 14    |

<sup>1,2</sup> Three biological replicates (1-3) were prepared; <sup>3</sup> N.D., Not detected
